# Supplementary material for: Germline Variants in DNA Repair Genes, Diagnostic Radiation, and Risk of Thyroid Cancer
Source: Oxford University Press journal article supplement (doi:10.1158/1055-9965.epi-17-0319), 2017-12-20
Supplement: 10559965epi170319-sup-181495_4_supp_4428422_p0g279.docx [file 10559965epi170319-sup-181495_4_supp_4428422_p0g279.docx]

| Supplementary Table 3. Statistically significant effect modification of genotypes between diagnostic radiation exposure and risk of papillary thyroid microcarcinoma (n=645). | | | | | | | | | | | |
| --- | --- | --- | --- | --- | --- | --- | --- | --- | --- | --- | --- |
|  | | | | | | | | | | | |
| Chromosome | Gene name | Genotype | |  | Non-exposed | | |  | Exposed | | |
| Cases | Controls | OR* (95% CI) | Cases | Controls | OR* (95% CI) |
| 7 | XRCC2_01 | rs10234749 | |  |  |  |  |  |  |  |  |
|  |  |  | CC |  | 2 | 36 | 1.00 |  | 120 | 251 | 10.12 (2.24-45.65) |
|  |  |  | AC or AA |  | 6 | 16 | 1.00 |  | 49 | 162 | 0.42 (0.12-1.50) |
|  |  |  | *P for interaction* |  |  |  |  |  |  |  | *0.0018* |
| 11 | ALKBH3_01 | rs12804822 | |  |  |  |  |  |  |  |  |
|  |  |  | AA |  | 1 | 33 | 1.00 |  | 95 | 232 | 16.28 (2.07-127.99) |
|  |  |  | AC or CC |  | 7 | 19 | 1.00 |  | 76 | 181 | 1.02 (0.35-2.95) |
|  |  |  | *P for interaction* |  |  |  |  |  |  |  | *0.016* |
| 11 | ALKBH3_07 | rs3740983 | |  |  |  |  |  |  |  |  |
|  |  |  | TT |  | 1 | 32 | 1.00 |  | 90 | 224 | 17.19 (2.16-136.76) |
|  |  |  | TG or GG |  | 7 | 20 | 1.00 |  | 81 | 189 | 1.08 (0.38-3.05) |
|  |  |  | *P for interaction* |  |  |  |  |  |  |  | *0.022* |
| 11 | ALKBH3_08 | rs7482199 | |  |  |  |  |  |  |  |  |
|  |  |  | TT |  | 1 | 34 | 1.00 |  | 88 | 231 | 15.93 (2.02-125.91) |
|  |  |  | TC or CC |  | 8 | 18 | 1.00 |  | 83 | 182 | 0.98 (0.36-2.68) |
|  |  |  | *P for interaction* |  |  |  |  |  |  |  | *0.016* |
| 11 | ALKBH3_11 | rs11037726 | |  |  |  |  |  |  |  |  |
|  |  |  | AA |  | 1 | 34 | 1.00 |  | 91 | 233 | 16.12 (2.04-127.49) |
|  |  |  | TA or TT |  | 8 | 18 | 1.00 |  | 80 | 179 | 1.00 (0.36-2.76) |
|  |  |  | *P for interaction* |  |  |  |  |  |  |  | *0.015* |
| 13 | PARP4_04 | rs4770687 | |  |  |  |  |  |  |  |  |
|  |  |  | GG |  | 5 | 13 | 1.00 |  | 42 | 121 | 0.65 (0.18-2.35) |
|  |  |  | AG or AA |  | 4 | 39 | 1.00 |  | 128 | 291 | 4.70 (1.52-14.48) |
|  |  |  | *P for interaction* |  |  |  |  |  |  |  | *0.036* |
| 13 | ERCC5_07 | rs4150355 | |  |  |  |  |  |  |  |  |
|  |  |  | GG |  | 7 | 22 | 1.00 |  | 65 | 173 | 0.88 (0.31-2.55) |
|  |  |  | AG or AA |  | 1 | 30 | 1.00 |  | 106 | 240 | 14.58 (1.84-115.65) |
|  |  |  | *P for interaction* |  |  |  |  |  |  |  | *0.020* |
| 13 | ERCC5_11 | rs17655 | |  |  |  |  |  |  |  |  |
|  |  |  | GG |  | 8 | 29 | 1.00 |  | 86 | 244 | 0.75 (0.28-1.98) |
|  |  |  | CG or CC |  | 1 | 23 | 1.00 |  | 85 | 169 | 19.83 (2.45-160.49) |
|  |  |  | *P for interaction* |  |  |  |  |  |  |  | *0.030* |
| 13 | ERCC5_13 | rs9586002 | |  |  |  |  |  |  |  |  |
|  |  |  | GG |  | 2 | 31 | 1.00 |  | 107 | 243 | 8.67 (1.90-39.70) |
|  |  |  | TG or TT |  | 6 | 21 | 1.00 |  | 64 | 170 | 0.83 (0.27-2.54) |
|  |  |  | *P for interaction* |  |  |  |  |  |  |  | *0.036* |
| 13 | ERCC5_14 | rs1886087 | |  |  |  |  |  |  |  |  |
|  |  |  | AA |  | 6 | 16 | 1.00 |  | 43 | 111 | 0.95 (0.28-3.24) |
|  |  |  | TA or TT |  | 2 | 36 | 1.00 |  | 128 | 302 | 7.25 (1.61-32.62) |
|  |  |  | *P for interaction* |  |  |  |  |  |  |  | *0.017* |
| *Adjusted for age (continuous), gender, race, and BMI. | | | | | | | | | | | |
