# Supplementary material for: Germline Variants in DNA Repair Genes, Diagnostic Radiation, and Risk of Thyroid Cancer
Source: Oxford University Press journal article supplement (doi:10.1158/1055-9965.epi-17-0319), 2017-12-20
Supplement: 10559965epi170319-sup-181495_4_supp_4428424_p0g279.docx [file 10559965epi170319-sup-181495_4_supp_4428424_p0g279.docx]

| Supplementary Table 5. Potential functional significance of selected SNPs on the binding of exonic splicing enhancers (ESEs). | | | |
| --- | --- | --- | --- |
|  |  |  |  |
| Chromosome | Gene name | SNP | Splicing factors potentially affected a |
| 3 | TOPBP1 | rs17301766 | SRSF1, SRSF2 |
| 3 | TOPBP1 | rs11706586 | SRSF1, SRSF1(IgM-BRCA1), SRSF6 |
| 3 | TOPBP1 | rs7349558 | SRSF5, SRSF6 |
| 7 | HUS1 | rs10951937 | SRSF6 |
| 7 | RPA3 | rs4720751 | SRSF6 |
| 7 | RPA3 | rs17136898 | SRSF2, SRSF6 |
| 7 | XRCC2 | rs10234749 | SRSF1 |
| 7 | RPA3 | rs4720751 | SRSF6 |
| 7 | HUS1 | rs3176595 | *-* |
| 7 | HUS1 | rs2708896 | *-* |
| 10 | MGMT | rs12769288 | SRSF1, SRSF1(IgM-BRCA1), SRSF2 |
| 10 | MGMT | rs1762444 | SRSF1, SRSF1(IgM-BRCA1), SRSF2, SRSF6 |
| 10 | MGMT | rs12219606 | SRSF1(IgM-BRCA1), SRSF5 |
| 10 | MGMT | rs4750763 | SRSF6 |
| 10 | MGMT | rs10829618 | *-* |
| 10 | MGMT | rs4751112 | SRSF1(IgM-BRCA1) |
| 10 | MGMT | rs11016885 | SRSF1, SRSF1(IgM-BRCA1), SRSF6 |
| 11 | ALKBH3 | rs11037690 | *-* |
| 11 | ALKBH3 | rs10768994 | *-* |
| 11 | ALKBH3 | rs10768995 | *-* |
| 11 | ALKBH3 | rs868784 | SRSF1, SRSF1(IgM-BRCA1), SRSF5 |
| 11 | ALKBH3 | rs3893853 | SRSF6 |
| 11 | ALKBH3 | rs4755217 | SRSF1, SRSF1(IgM-BRCA1), SRSF5, SRSF6 |
| 11 | ALKBH3 | rs1973717 | *-* |
| 11 | ALKBH3 | rs12804822 | SRSF2 |
| 11 | ALKBH3 | rs3740983 | *-* |
| 11 | ALKBH3 | rs7482199 | SRSF1, SRSF1(IgM-BRCA1) |
| 11 | ALKBH3 | rs11037726 | SRSF2, SRSF5 |
| 11 | ALKBH3 | rs10838191 | SRSF5 |
| 12 | UBE2N | rs7968453 | SRSF1, SRSF1(IgM-BRCA1) |
| 13 | PARP4 | rs4770687 | SRSF2, SRSF6 |
| 13 | ERCC5 | rs4150355 | SRSF1(IgM-BRCA1) |
| 13 | ERCC5 | rs17655 | SRSF2, SRSF6 |
| 13 | ERCC5 | rs9586002 | SRSF1, SRSF1(IgM-BRCA1) |
| 13 | ERCC5 | rs1886087 | SRSF5 |
| 19 | LIG1 | rs251693 | SRSF1, SRSF5, SRSF6 |
| 19 | LIG1 | rs2288878 | SRSF2, SRSF5 |
| 19 | LIG1 | rs274897 | SRSF1, SRSF1(IgM-BRCA1) |
| 19 | LIG1 | rs2386523 | *-* |
| 19 | LIG1 | rs2163619 | *-* |
| 19 | LIG1 | rs274873 | SRSF1(IgM-BRCA1), SRSF2 |
| 19 | LIG1 | rs10421339 | SRSF1(IgM-BRCA1), SRSF2, SRSF5 |
| X | UBE2A | rs5910616 | SRSF1, SRSF2 |
| a ESEfinder was used to detect changes to putative ESE binding sequences between the two alleles of each SNP. | | | |
